# Supplementary material for: Integrative Comparative Assessment of Cold Acclimation in Evergreen and Deciduous Iris Species
Source: MDPI journal article supplement (doi:10.3390/antiox11050977), 2022-05-16
Supplement: s1 [file s1]

Table S1

Temperatures set for semi-lethal temperature (LT<sub>50</sub>) detremination (°C) on each sampling date.

| Sampling date | Nov.13 | Nov.27 | Dec.11 | Dec.25 | Jan.8 | Jan.22 | Feb.4 | Feb.19 | Mar.5 | Mar.18 |
|---------------|--------|--------|--------|--------|-------|--------|-------|--------|-------|--------|
| Temperature 1 | 4      | 0      | 0      | -4     | -4    | -4     | -4    | -5     | 0     | 0      |
| Temperature 2 | 0      | -3     | -4     | -8     | -8    | -8     | -8    | -10    | -4    | -4     |
| Temperature 3 | -3     | -6     | -8     | -12    | -12   | -12    | -12   | -15    | -8    | -8     |
| Temperature 4 | -6     | -9     | -12    | -16    | -16   | -16    | -16   | -20    | -12   | -12    |
| Temperature 5 | -9     | -12    | -16    | -20    | -20   | -20    | -20   | -25    | -16   | -16    |
| Temperature 6 | -12    | -15    | -20    | NA     | NA    | NA     | NA    | NA     | NA    | NA     |

Note: NA indicated temperature 6 was not set.

Table S2

Genes and corresponding primers used for quantitative real-time PCR.

| Gene name                                             | Gene full name                         | <i>Arabidopsis</i> homolog | Functional description                                                      | Forward/reverse primer sequence (5'-3')        |
|-------------------------------------------------------|----------------------------------------|----------------------------|-----------------------------------------------------------------------------|------------------------------------------------|
| reference gene                                        |                                        |                            |                                                                             |                                                |
| <i>ACT7</i>                                           | <i>Actin7</i>                          | AT5G09810                  | cell division, cytoskeleton organization                                    | ACATTGTGCTCAGTGAGGT/<br>ACTTCCTCTCTGGTGGAGCA   |
| Genes associated with carbohydrate metabolism process |                                        |                            |                                                                             |                                                |
| <i>SEX4</i>                                           | <i>starch-excess 4</i>                 | AT3G52180                  | starch catabolic process                                                    | GTAAACGGCCATGCTTTCCG/<br>TTCTCTGCCCCATCCAATG   |
| <i>MEX1</i>                                           | <i>maltose excess 1</i>                | AT5G17520                  | Starch metabolism process                                                   | CCCGAATAGCATTTTGCCCG/<br>ACAAGTCTCGCTCCTTGCTC  |
| <i>SUT4</i>                                           | <i>sucrose transporter 4</i>           | AT1G09960                  | sucrose metabolic process, sucrose transport                                | TGCTTGGCTTTGCTACTGGA/<br>GGGGACTTCTTGGACTGACG  |
| <i>AMY3</i>                                           | <i>alpha-amylase-like 3</i>            | AT1G69830                  | starch catabolic process                                                    | GTGGGCGAGTATTGGGACTC/<br>ACGTCAAAGGCACCACAAGT  |
| <i>ISA3</i>                                           | <i>isoamylase 3</i>                    | AT4G09020                  | starch catabolic process                                                    | TGCGTTCTCGGCAAATGAAG/<br>TTGTTCCGTTACGCGTGTG   |
| <i>DPE2</i>                                           | <i>disproportionating enzyme 2</i>     | AT2G40840                  | starch catabolic process                                                    | GGAGAGCCCGTCTTACACAG/<br>TCCCAACCAGACCCGTAAGA  |
| <i>GLT1</i>                                           | <i>glucose transporter 1</i>           | AT5G16150                  | response to trehalose                                                       | ATGTTGCAGCTAGTGCCCTT/<br>TGAAGCAGCCATTCCAGTGA  |
| <i>SUS4</i>                                           | <i>sucrose synthase 4</i>              | AT3G43190                  | sucrose metabolic process                                                   | GCGAAATGGCGAGCTGTATC/<br>TAGGCCGTCGCAAATGTAGG  |
| <i>GWD3</i>                                           | <i>phosphoglucan water dikinase</i>    | AT5G26570                  | Starch metabolism process                                                   | CTACAGAGGCCATGCTTGCT/<br>TCGGTCAAGCTTCCTGCATT  |
| <i>LSF1</i>                                           | <i>Like SEX4 1</i>                     | AT3G01510                  | starch catabolic process                                                    | AACAGCACAAAGGATGGCGTA/<br>GGAAAGCTCCCATATGCCCA |
| <i>SS3</i>                                            | <i>starch synthase 3</i>               | AT1G11720                  | Starch biosynthetic process                                                 | TGCTCCTGTTGCGTGTTAT/<br>CACCGTCGTAGCCTTATCGG   |
| <i>BAM3</i>                                           | <i>beta-amylase 3</i>                  | AT4G17090                  | maltose biosynthetic process, response to cold                              | TGGCGAGTTCCAGTGCTATG/<br>TCCCGTAGTCCGAGTTCCAT  |
| <i>GBSS</i>                                           | <i>granule bound starch synthase</i>   | AT1G32900                  | starch biosynthetic process                                                 | ACCGAGTCTTGACAGTGAGC/<br>TCGTTTGCTGGATCCCACTC  |
| <i>BAM1</i>                                           | <i>beta-amylase 1</i>                  | AT5G65700                  | starch catabolic process                                                    | TTCCATTGCATTGCGGTGCG/<br>TTGTAGACGATTCCGGCCC   |
| <i>SNRK1.1</i>                                        | <i>snf1-related protein kinase 1.1</i> | AT3G01090                  | sugar mediated signaling pathway, abscisic acid-activated signaling pathway | GTTCCACTGGGCATCCTGAA/<br>TCCTCCCTCGTCTTGTAAGC  |
| Genes associated with phytohormone signaling pathway  |                                        |                            |                                                                             |                                                |
| <i>TIR1</i>                                           | <i>transport inhibitor response 1</i>  | AT3G62980                  | response to auxin                                                           | CGCTTCCGGCTCTGTATCAT/<br>GTCAGCAGAGGCCCAATAG   |

|                |                                                          |           |                                                                                    |                                                |
|----------------|----------------------------------------------------------|-----------|------------------------------------------------------------------------------------|------------------------------------------------|
| <i>AMT1</i>    | <i>a-methyl tryptophan resistant 1</i>                   | AT5G05730 | auxin biosynthetic process                                                         | TGCCGACCCATTGAAGTGT/<br>AGAATCTCAGGGCTTGACGC   |
| <i>IAA27</i>   | <i>indole-3-acetic acid inducible 27</i>                 | AT4G29080 | response to auxin                                                                  | CCTCGGCACTTGAGAAGATGT/<br>CCAGGGTACGTCACCAACAA |
| <i>GH3.2</i>   | <i>auxin upregulated 3</i>                               | AT4G37390 | auxin homeostasis, response to auxin                                               | TCTGCCGTTCATCCGCTTC/<br>GGTGACGGAATCTCGGACAG   |
| <i>ABA1</i>    | <i>ABA deficient 1</i>                                   | AT5G67030 | abscisic acid biosynthetic process, sugar mediated signaling pathway               | GGAAAGCTCTGAGACAGGGG/<br>GGAAAGCTCTGAGACAGGGG  |
| <i>ABA2</i>    | <i>ABA deficient 2</i>                                   | AT1G52340 | abscisic acid biosynthetic process, proline biosynthetic process                   | AGATTCGGGATTTCGCGTCAA/<br>CCTCGAACTCCTCGTTCGTC |
| <i>AAO3</i>    | <i>abscisic aldehyde oxidase 3</i>                       | AT2G27150 | abscisic acid biosynthetic process                                                 | TCCCCTGCGTTCAAGAAGTC/<br>GGCTCACCAACCGGAAAGTA  |
| <i>NCED3</i>   | <i>nine-cis-epoxycarotenoid dioxygenase 3</i>            | AT3G14440 | abscisic acid biosynthetic process                                                 | GCCGGGCTCATCTACTTCAA/<br>CTGCCGTCGAAATCGTACCT  |
| <i>PUB44</i>   | <i>Arabidopsis thaliana plant u-box 44</i>               | AT1G20780 | negative regulation of abscisic acid biosynthetic process                          | TTCCACCGCTCATGAAGGAC/<br>AAGTCAGCACCCGAAGACAC  |
| <i>PYL8</i>    | <i>PYR1-LIKE 8</i>                                       | AT5G53160 | positive regulation of abscisic acid-activated signaling pathway                   | AGACCAGGGACGCTAGTGAT/<br>TCTATGGCTAGACGCTCGGA  |
| <i>PP2C5</i>   | <i>phosphatase 2C5</i>                                   | AT2G40180 | abscisic acid-activated signaling pathway                                          | AGGTGGGAAAGAAGCTGCAA/<br>TGCTGCCTCTAGGGATGACA  |
| <i>SnRK2.4</i> | <i>snf1-related protein kinase 2.4</i>                   | AT1G10940 | abscisic acid signaling pathway                                                    | GCCGAGGTTGAAGATTGCG/<br>CCAGCTTGCCGTCGTATTCT   |
| <i>ABF1</i>    | <i>abscisic acid responsive element-binding factor 1</i> | AT1G49720 | abscisic acid-activated signaling pathway                                          | AAGGCCTACCAGCTGAGTCT/<br>CGCAATCCTCTTCTCCGTT   |
| <i>ABF4</i>    | <i>abscisic acid responsive element-binding factor 4</i> | AT3G19290 | abscisic acid-activated signaling pathway                                          | TGGTGAGCAGTGGATTGGTG/<br>AGGTACTGGTGACAACGACG  |
| <i>AREB3</i>   | <i>ABA-responsive element binding protein 3</i>          | AT3G56850 | abscisic acid-activated signaling pathway                                          | TCGTGCGGTTCCCCAAATAA/<br>ATCTTATCCGTGTCCCCCGA  |
| <i>SnRK2.6</i> | <i>snf1-related protein kinase 2.6</i>                   | AT4G33950 | abscisic acid-activated signaling pathway                                          | AATAGCGGAGGCCACAATCC/<br>TGGCATTGACTATCTCGCCG  |
| <i>HOS1</i>    | <i>high expression of osmotically responsive genes 1</i> | AT2G39810 | response to cold                                                                   | TTCTACGATGCATTGGGCGT/<br>AACCGGCCACTTTCAATCCT  |
| <i>ICE1</i>    | <i>inducer of CBF Expression 1</i>                       | AT3G26744 | abscisic acid-activated signaling pathway; response to cold, freezing              | CGACATCCTTACCAAGCCCA/<br>CCATCAAGTGCCCTCATCGT  |
| <i>COI1</i>    | <i>coronative insensitive 1</i>                          | AT2G39940 | jasmonic acid mediated signaling pathway                                           | TTGGAAGAGTTTGGTGGGGG/<br>ACAGGCATCTCGTTTGTCCT  |
| <i>JAZ2</i>    | <i>jasmonate-zim-domain protein 2</i>                    | AT1G74950 | response to jasmonic acid                                                          | AGCCAACCCAAGTCACTGTT/<br>TATGGTGCCCTGGCAATTGAT |
| <i>MYC2</i>    | <i>jasmonate insensitive 1</i>                           | AT1G32640 | Phytohormone (JA) signaling                                                        | TCGATTTCGGAGAACGAGAGC/<br>CGCTTCCGTGCCCATATTC  |
| <i>CBF2</i>    | <i>C-repeat binding factor 2</i>                         | AT4G25470 | cold acclimation; response to cold; regulation of transcription                    | TTGGGAGAGAATTCGCGGG/<br>ATCCCTCCGCCATATCCTT    |
| <i>CBF4</i>    | <i>C-repeat binding factor 4</i>                         | AT5G51990 | regulation of transcription                                                        | GCCGTCTAGTTCGTCGGTAG/<br>CGTCTCCCTGCATCATAGC   |
| <i>COR27</i>   | <i>cold regulated gene 27</i>                            | AT5G42900 | response to cold                                                                   | TGGTTGCATGACAGAGGCAT/<br>CCACAGACGGAACCACTTGA  |
| <i>GA20ox2</i> | <i>gibberellin 20-oxidase</i>                            | AT5G51810 | gibberellin biosynthetic process, response to gibberellin                          | TCATTCAAACCTCGGCGAA/<br>GAGTCGTGCCCTCGAAGAA    |
| <i>GID1c</i>   | <i>GA insensitive dwarf1C</i>                            | AT5G27320 | gibberellin mediated signaling pathway                                             | TCCGCTTACGATGACGGATG/<br>ACATTATGCGCGATGTTGCC  |
| <i>GAI</i>     | <i>gibberellic acid insensitive</i>                      | AT1G14920 | negative regulation of seed germination, jasmonic acid mediated signaling pathway, | AGCAGGACCAGTTGATGTCG/<br>CATGCTCGCCTGCTTGAAC   |

|                                               |                                                  |           |                                                                                                      |                                                |
|-----------------------------------------------|--------------------------------------------------|-----------|------------------------------------------------------------------------------------------------------|------------------------------------------------|
| <i>SPY</i>                                    | <i>spindly</i>                                   | AT3G11540 | gibberellic acid mediated signaling pathway, regulation of reactive oxygen species metabolic process | AGGGATGATGGCTTGCAGAC/<br>CAGGCAGACGAACCAACTCT  |
| Genes associated with stress response process |                                                  |           |                                                                                                      |                                                |
| <i>GST8</i>                                   | <i>glutathione transferase 8</i>                 | AT1G78380 | response to oxidative stress                                                                         | CACCTATGAGACCAACGCCA/<br>CCTTGTGGGGATCAGAGAGC  |
| <i>GSTL2</i>                                  | <i>glutathione transferase lambda 2</i>          | AT3G55040 | response to stress                                                                                   | GTGGATATCGCATACGCTCCA/<br>GCCGAGTTGATGTGTAGGCA |
| <i>GPX6</i>                                   | <i>glutathione peroxidase 6</i>                  | AT4G11600 | response to oxidative stress                                                                         | TTCCCGTGCAACCAGTTTGG/<br>GGTGAAGCCTTGTCCCCATT  |
| <i>P5CS2</i>                                  | <i>delta1-pyrroline-5-carboxylate synthase 2</i> | AT3G55610 | L-proline biosynthetic process;                                                                      | AAGCAACGTAGAGGGAGCAG/<br>GCATTGGACACAACGAGGTC  |
| <i>P5CR</i>                                   | <i>delta 1-pyrroline-5-carboxylate reductase</i> | AT5G14800 | proline biosynthetic process                                                                         | TCGAGATCCTCAACGACAGC/<br>CAGACCACTCCTGCAAGTCT  |
| <i>PRXR1</i>                                  | <i>PRXR1</i>                                     | AT4G21960 | response to oxidative stress                                                                         | AAGCTGGTGCATCGTCTGTA/<br>GTCCAGTATCATCGGGGTCC  |
| <i>APX1</i>                                   | <i>ascorbate peroxidase 1</i>                    | AT1G07890 | oxidation-reduction process                                                                          | CTACCTGATGCGACCGAAGG/<br>ATGTCCATGCTCCCTCGAAC  |
| <i>FER2</i>                                   | <i>FERRITIN 2</i>                                | AT3G11050 | response to abscisic acid, response to oxidative stress                                              | AGCTTGCTGACTTTGTGGAGA/<br>ATCAAAATGCCAGACCCCGT |
| <i>TAPX</i>                                   | <i>thylakoidal ascorbate peroxidase</i>          | AT1G77490 | cold acclimation, hydrogen peroxide mediated signaling pathway                                       | ATCCTCCAGAGGGTGTCTCC/<br>TGTTACACGGTTGAAAAGC   |
| <i>MDAR1</i>                                  | <i>monodehydroascorbate reductase 1</i>          | AT3G52880 | oxidation-reduction process                                                                          | TGCCGTGGGATTGTATTCTGA/<br>TTTCCGCCAACTCCTACCAC |

**Table S3**  
Changes of relative chlorophyll content (RCC), leaf width (LW), No. of functional leaves (NFL) and fresh weight (FW) in evergreen and deciduous irises during natural cold acclimation and deacclimation.

| Sampling stage | Deciduous iris |             |            |            | Evergreen iris |              |             |              |
|----------------|----------------|-------------|------------|------------|----------------|--------------|-------------|--------------|
|                | RCC            | LW (mm)     | FW (g)     | NFL        | RCC            | LW (mm)      | FW (g)      | NFL          |
| Nov.13         | 47.27±1.74a    | 21.20±0.62a | 1.33±0.09b | 6.60±0.55a | 59.70±1.45a    | 23.93±0.40b  | 1.83±0.06b  | 4.80±0.45fg  |
| Nov.27         | 36.97±2.39c    | 17.20±0.36b | 0.96±0.04b | 5.60±0.55b | 56.63±1.11b    | 22.37±0.40bc | 1.56±0.04c  | 4.40±0.55g   |
| Dec.11         | 31.70±1.61d    | 14.73±0.25c | 0.31±0.04c | 4.40±0.55c | 52.33±1.84c    | 18.70±6.15d  | 1.32±0.09d  | 5.00±0.71efg |
| Dec.25         | NA             | NA          | NA         | NA         | 48.87±1.19d    | 13.27±0.59e  | 0.67±0.08e  | 5.40±0.55def |
| Jan.8          | NA             | NA          | NA         | NA         | 47.13±1.56d    | 12.23±0.25e  | 0.34±0.06f  | 5.20±0.45ef  |
| Jan.22         | NA             | NA          | NA         | NA         | 39.10±1.25g    | 11.87±0.40e  | 0.25±0.02fg | 5.60±0.55cde |
| Feb.5          | NA             | NA          | NA         | NA         | 43.17±0.91f    | 12.80±0.30e  | 0.12±0.01g  | 6.00±0.71bcd |
| Feb.19         | NA             | NA          | NA         | NA         | 46.53±0.97de   | 20.20±0.36cd | 0.68±0.06e  | 6.20±0.45abc |
| Mar.4          | NA             | NA          | NA         | NA         | 44.17±2.21ef   | 23.00±0.62bc | 1.65±0.21c  | 6.40±0.55ab  |
| Mar.18         | 43.50±1.75b    | 14.57±0.60c | 3.04±0.46a | 3.40±0.55d | 51.57±1.66c    | 27.53±0.93a  | 2.98±0.20a  | 6.80±0.45a   |

Note: Data are means ± (standard error) of ten independent biological replicates with different letters indicating significant differences between treatments according to Duncan's multiple range test at  $p < 0.05$ . NA indicated no plant material for determination.

**Table S4**  
Comparison in characteristics of leaf microstructure between evergreen and deciduous irises.

| Species        | Characteristics of leaf structure |                     |            |                                                 |                         |                                                         |
|----------------|-----------------------------------|---------------------|------------|-------------------------------------------------|-------------------------|---------------------------------------------------------|
|                | Leaf thickness (um)               | Epidermal cell size |            | No. of layer of mesophyll cell with chloroplast | Stomatal apparatus size |                                                         |
|                |                                   | Length (um)         | Width (um) |                                                 | Major axis (um)         | Minor axis (um)                                         |
| Evergreen iris | 622.9                             | 27.5                | 22.5       | 7                                               | 27.2                    | 27.2                                                    |
| Deciduous iris | 585.3                             | 12.5                | 11         | 7                                               | 20                      | 16.7                                                    |
|                |                                   |                     |            |                                                 |                         | Stomatal apparatus densities (entries/mm <sup>2</sup> ) |
|                |                                   |                     |            |                                                 |                         | 267                                                     |
|                |                                   |                     |            |                                                 |                         | 286.07                                                  |
