# Supplementary figures and images for: Integrative Comparative Assessment of Cold Acclimation in Evergreen and Deciduous Iris Species
Source: MDPI journal article supplement (doi:10.3390/antiox11050977), 2022-05-16

A

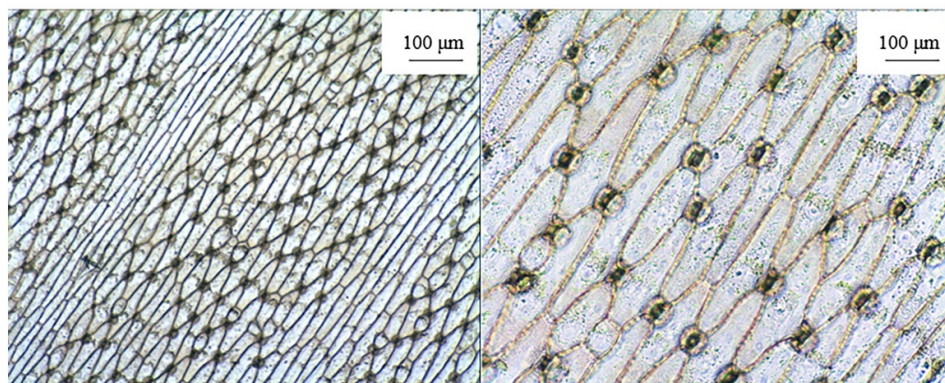

B

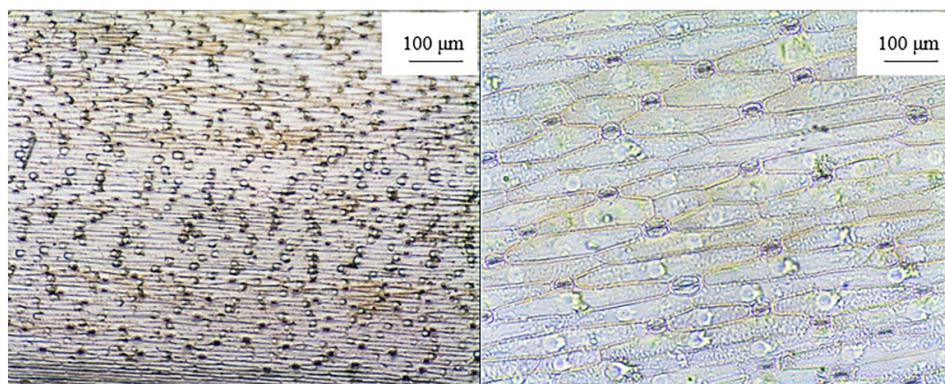

Figure S1. Leaf epidermis slices of (A) evergreen and (B) deciduous irises.

Supplement: s1 [file s1]
